# Supplementary material
Source: PubMed Central journal article supplement (PMC2797236)
Supplement: supp_M109.022764_jbc.M109.022764-1.pdf [file supp_M109.022764_jbc.M109.022764-1.pdf]

# **Molecular basis of transcriptional mutagenesis at 8-oxoguanine**

Gerke E. Damsma and Patrick Cramer

**Supplementary Figures**

## Supplementary Figures

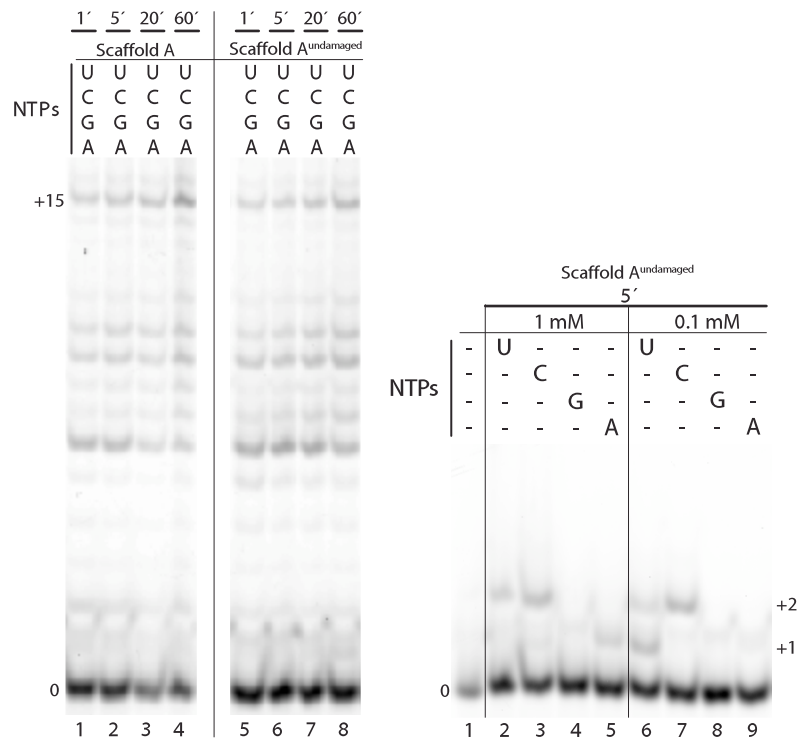

**Figure S1. RNA extensions assays**

The lanes show the fluorescently labeled RNA. The scaffolds were incubated with Pol II and indicated NTPs for the time that is indicated above. On the left, 1 mM NTP mix was used to elongate scaffold A with an 8-oxoguanine or with a normal guanine (Scaffold A<sub>undamaged</sub>). On the right, single NTPs were added to undamaged scaffold A, different concentrations where used, as indicated.

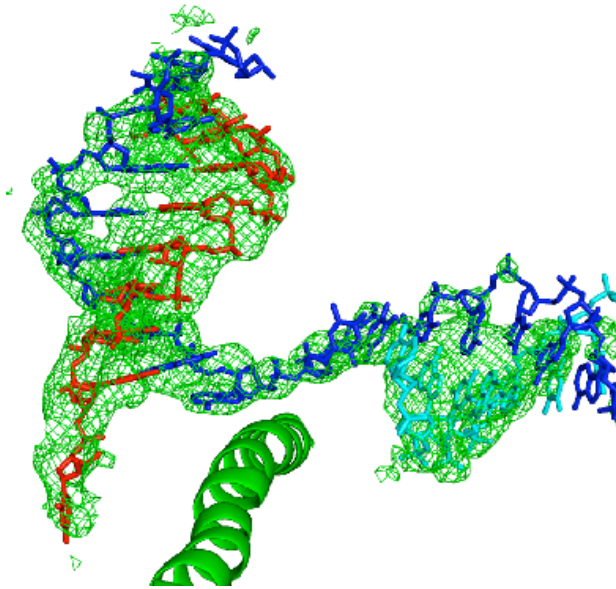

**Figure S2. Control structure of an undamaged Pol II elongation complex.**

The density map of undamaged Pol II elongation complex D (scaffold D<sup>undamaged</sup>). The difference  $F_o-F_c$  density map of the nucleic acids is shown (green, contoured at  $3.0\sigma$ ). The model of complex D is shown. The frayed RNA which was found in the structure of complex D, can also be seen for the undamaged structure.
